# Supplementary material
Source: publisher site journal article supplement (https://www.dovepress.com/article/219670)
Supplement: Supplementary file 1 [file get_supplementary_file.php]

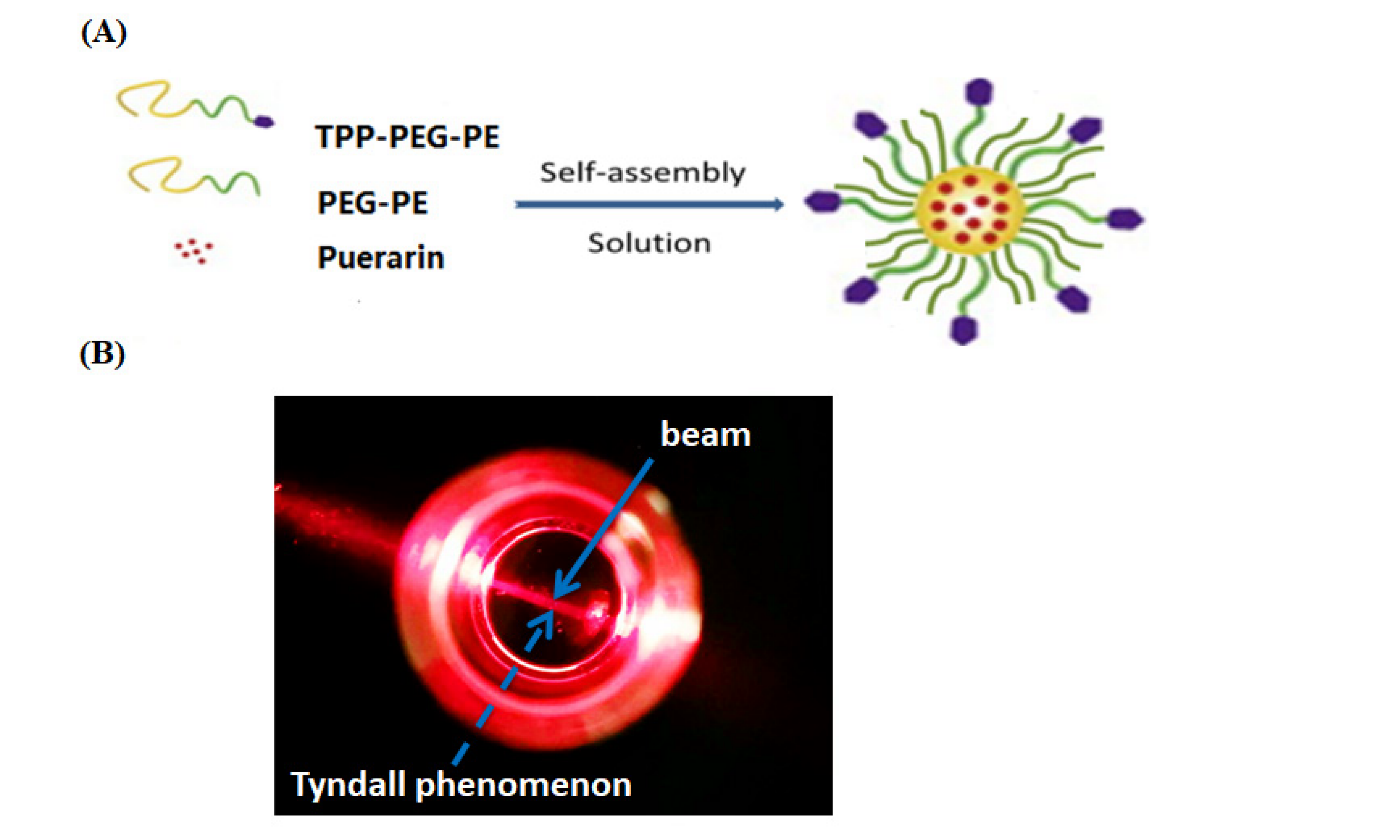


Figure S1. The schematic diagram of self-assembly PUE@TPP/PEG-PE micelles (A) and Tyndall phenomenon of this micelles (B).
